# Supplementary material
Source: HighWire-hosted journal article supplement (http://www.cmaj.ca/highwire/filestream/74407/field_highwire_adjunct_files/0/190584-com-1-at.pdf)

# Maternal Newborn Child & Youth Strategic Clinical Network

## Transformational Roadmap Summary 2017-2020

**MNCY SCN VISION:** Healthy mothers, newborns, children, youth and families.

**MNCY SCN MISSION:** To bring together people, evidence and data to achieve the best possible health outcomes for mothers, newborns, children, youth and families within a sustainable publicly funded healthcare system.

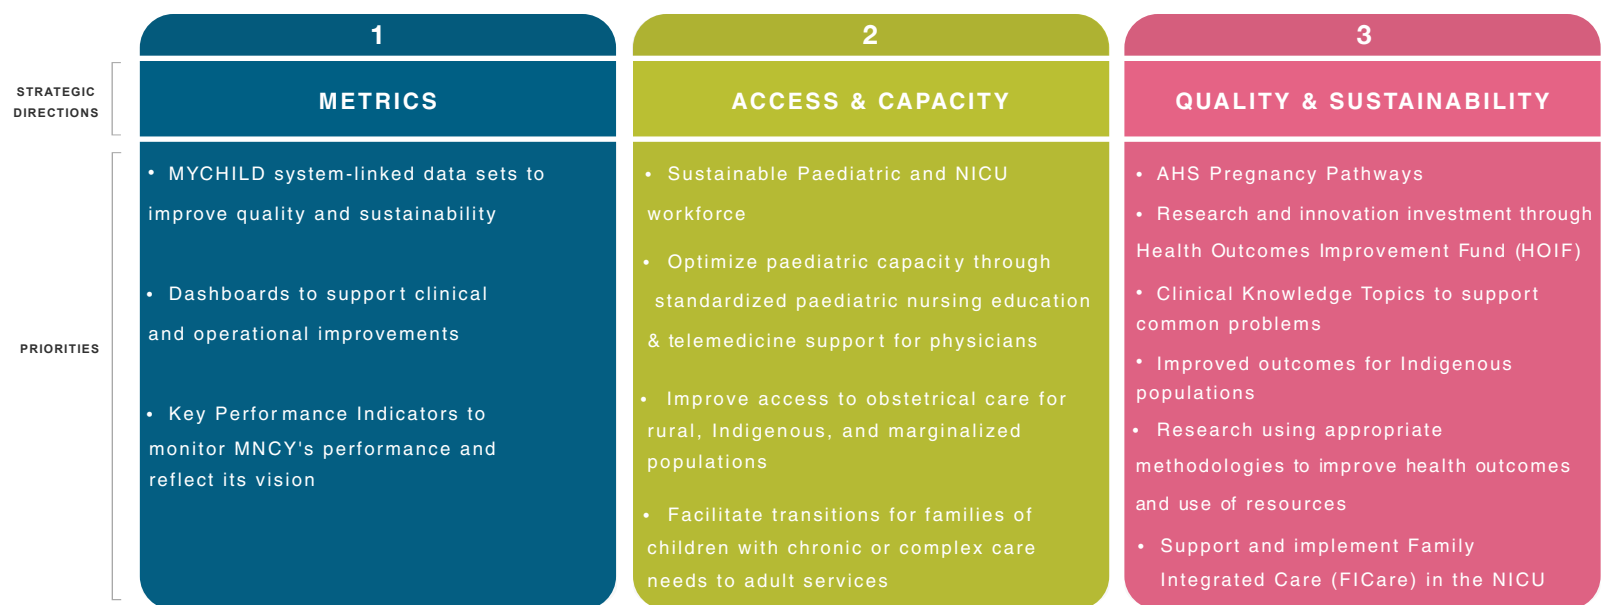

**SUCCESSSES**

- |                                                                                                                                                                                                                                 |                                                                                                                                                                                                                                                                                                                                                                                                                                                                                                                                                                                                                                                |                                                                                                                                                                                                                                                                                                                                                                                                                                                                                                                                                                                                                                                                             |
|---------------------------------------------------------------------------------------------------------------------------------------------------------------------------------------------------------------------------------|------------------------------------------------------------------------------------------------------------------------------------------------------------------------------------------------------------------------------------------------------------------------------------------------------------------------------------------------------------------------------------------------------------------------------------------------------------------------------------------------------------------------------------------------------------------------------------------------------------------------------------------------|-----------------------------------------------------------------------------------------------------------------------------------------------------------------------------------------------------------------------------------------------------------------------------------------------------------------------------------------------------------------------------------------------------------------------------------------------------------------------------------------------------------------------------------------------------------------------------------------------------------------------------------------------------------------------------|
| <ul style="list-style-type: none"> <li>• MyCHILD partnership with PolicyWise, funded by WCHRI, Alberta Innovates, U of C Paediatrics</li> <li>• Key performance indicators developed through Modified Delphi process</li> </ul> | <ul style="list-style-type: none"> <li>• Paediatric workforce supports regional service delivery</li> <li>• Telemedicine pilot project to be implemented between ACH &amp; Medicine Hat</li> <li>• Antenatal Pathway supports consistency of care along maternity corridors of care</li> <li>• Clinical practice guidelines to support criteria for obstetrical care, assessment of risk for preterm labour, care of the late preterm newborn, obstetrical triage, and NICU capacity management</li> <li>• Current research examining effectiveness of transitions navigator for children with chronic or complex health care needs</li> </ul> | <ul style="list-style-type: none"> <li>• 46/50 hospitals implemented Normal Postpartum and Newborn pathways</li> <li>• MNCY SCN HOIF - 19 paediatric, neonatal and obstetrical research projects, \$2.1 million</li> <li>• Clinical pathways and medical order sets for induction of labour, paediatric concussion, paediatric diabetic ketoacidosis, and postpartum hemorrhage</li> <li>• 3 Indigenous community outcome improvement projects funded by MERCK &amp; Alberta Innovates</li> <li>• Discontinued usage of rapid fetal fibronectin averted costs of up to \$1 million per year.</li> <li>• Family Integrated Care implemented in 5/10 level 2 NICUs</li> </ul> |
|---------------------------------------------------------------------------------------------------------------------------------------------------------------------------------------------------------------------------------|------------------------------------------------------------------------------------------------------------------------------------------------------------------------------------------------------------------------------------------------------------------------------------------------------------------------------------------------------------------------------------------------------------------------------------------------------------------------------------------------------------------------------------------------------------------------------------------------------------------------------------------------|-----------------------------------------------------------------------------------------------------------------------------------------------------------------------------------------------------------------------------------------------------------------------------------------------------------------------------------------------------------------------------------------------------------------------------------------------------------------------------------------------------------------------------------------------------------------------------------------------------------------------------------------------------------------------------|

PRINCIPLES Families as Partners Innovation & Knowledge Translation Coordination & Collaboration Integration Outcome Focused

Appendix to: Kromm S, McNeil D, Johnson D. The Maternal Newborn Child & Youth Strategic Clinical Network: Improving health outcomes and system efficiency through partnerships. *CMAJ* 2019. doi: 10.1503/cmaj.190584. Copyright © 2019 The Author(s) or their employer(s). To receive this resource in an accessible format, please contact us at [cmajgroup@cmaj.ca](mailto:cmajgroup@cmaj.ca).

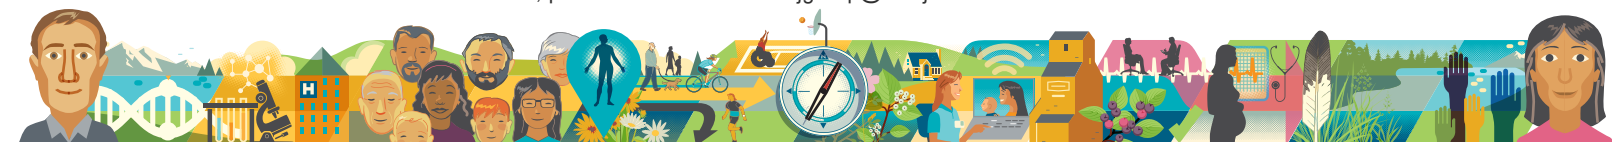

Supplement: 190584-com-1-at.pdf [file 190584-com-1-at.pdf]
